# Supplementary material for: Bisulfite sequencing of chromatin immunoprecipitated DNA (BisChIP-seq) directly informs methylation status of histone-modified DNA
Source: HighWire-hosted journal article supplement (doi:10.1101/gr.132076.111), 2012-03-30
Supplement: SuppLegends.docx [file SuppLegends.docx]

**Supplementary Figures**

**Supplementary Figure 1**. Bisulphite treatment and Illumina library preparation of H3K27me3-ChIP DNA. **(a)** Quantitation of bisulphite-treated DNA after different treatments determined by MSH-PCR for the *GSTP1* and *EN1* genes; enrichment relative to input. (**b**) Library preparation PCR optimization using 5ul, 10ul and 22.5ul of bisulphite-treated DNA, respectively. (**c**) Optimization of the number of PCR cycles for library preparation, testing 10,12, 14 and 18 cycles, respectively (indicated by arrow). (**d**) Bioanalyser analysis of the of H3K27me3-bisulphite-treated DNA library preparation for LNCaP and PrEC cells (indicated by arrow).

**Supplementary Figure 2**. H3K27me3-ChIP of LNCaP and PrEC cells. (**a**) Validation of H3K27me3-ChIP of candidate genes that show either differential (*MDFIC, CAV1, CAV2, MET, WNT2, CFTR, EN1, MYOD*); or no (*NAA38, GAPDH*) H3K27me3 binding pattern in LNCaP and PrEC by real-time qPCR. For each gene, enrichment over input is shown. (**b**) The post-bisulphite ChIP (BisChIP-seq) UCSC genome browser screenshots are shown relative to the TSS and CpG islands. Thick blue (PrEC) and red (LNCaP) bars indicate regions of significant enrichment called by ChromaBlocks.

**Supplementary Figure 3**. Strand correlation plot. Methylation ratio at individual CpG sites with minimum 10x coverage on the plus (x-axis) and minus (y-axis) strands of the PrEC and LNCaP bisulphite sequencing.

**Supplementary Figure 4**. Validation of methylation ratios obtained by BisChIP-Seq. (**a**) Scatterplots of methylation ratios determined by BisChIP-Seq (y-axis) on crosslinked DNA versus Infinium HumanMethylation450 BeadChip arrays (x-axis) on native PrEC and LNCaP DNA. Each point corresponds to a CpG site interrogated by the BeadChip array which is covered by 10 reads or more in the BisChIP-Seq. 'r' values refer to the pearson correlation score. (**b**) Examples of comparative methylation levels derived by clonal bisulfite sequencing across CAV2 and KLK4 promoters from native DNA (upper panel; black is methylated, grey is unmethylated, each line an independant clone) to individual BisChIP-Seq reads of the same genomic region on cross-linked DNA (lower panel).

**Supplementary Figure 5**. BisChIP-seq examples showing differential methylation. UCSC Browser screen shot of TSS and CpG islands, which are H3K27me3 enriched from BisChIP-seq data in both PrEC and LNCaP. Enlarged regions show examples of H3K27me3-marked regions that are associated with unmethylated DNA in PrEC cells and methylated DNA in LNCaP cells; (**a**) HOXA9; (**b**) C5orf52; (**c**) FOXL2/C3orf72; (**d**) SLC16A12. Individual bisulphite molecule sequencing reads from BisChIP-seq are shown with CpG sites (black circles) marked in yellow shading for each molecule. CpG DNA methylation > 10 reads: red circles.

**Supplementary Figure 6**: Comparison of gene expression and level of DNA methylation and H3K27me3. Affymetrix Gene 1.0 ST expression values in PrEC and LNCaP for genes whose TSS is unmarked by H3K27me3 compared to those which are H3K27me3 marked and simultaneously display Low (0%-20%), Medium (20%-60%) or High (60%-100%) DNA methylation levels.

**Supplementary Figure 7**. BisChiP-seq examples showing allele-specific methylation in PrEC and LNCaP cells. (**a**) Allele-specific methylation in PrEC cells; chr20: rs62196810; chr19: rs56362636; chr12: rs4883475; chr10: rs11015753. (b) Allele-specific methylation in LNCaP cells; chr20: rs237722; chr17: rs58810310; chr21: rs11184058; chr6: rs4745131. UCSC Browser screen shots of BisChIP-seq data indicate regions of significant H3K27me3-enrichment called by ChromaBlocks. Purple lines represent position of the SNPs. Individual bisulphite molecule sequencing reads shown with CpG sites (black circles) marked in yellow shading for each molecule. BisChIP-seq readout of CpG DNA methylation > 10 reads: red circles. Allele-specific methylation ratio indicated by bar graphs.

**Supplementary Tables.**

Supplementary Table 1. Sequencing statistics for BisChIP-Seq.

Supplementary Table 2. ChIP Primers
